# Supplementary material for: Simultaneous Identification and Dynamic Analysis of Saccharides during Steam Processing of Rhizomes of Polygonatum cyrtonema by HPLC–QTOF–MS/MS
Source: PubMed Central journal article supplement (PMC6278431; doi:10.3390/molecules23112855), 2018-11-02
Supplement: molecules-23-02855-s001.pdf [file molecules-23-02855-s001.pdf]

## Supplementary material (Jin et al)

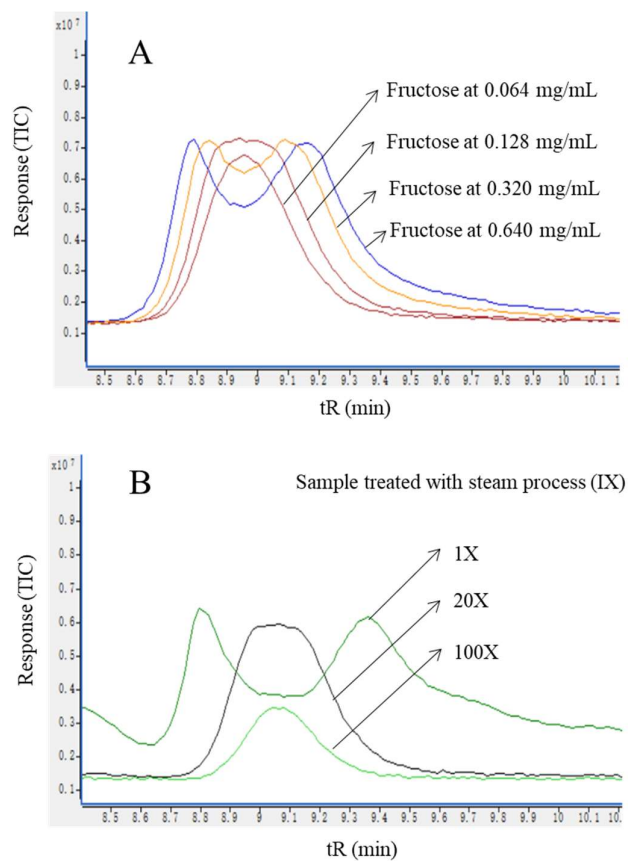

**Figure S1.** Total ion chromatogram of fructose at different concentration (A) and nine times steam-treated samples of *P. cyrtonema* diluted to 20-fold and 100-fold (B) by HPLC-QTOF-MS/MS at solvent flow rate 1.0 mL/min.
